# Supplementary material
Source: Springer Nature journal article supplement (https://www.springermedizin.de/resource/supplementary/12943_2012_1079_MOESM1_ESM.pdf/9552224)
Supplement: MOESM1 [file 9552224]

Supplementary Table S1. Short interfering RNAs used in a systematic knockdown screening of MAPK-associated genes in pancreatic cancer

| Accession | Gene symbol | Entrez Gene nomenclature                                            | Sense strand          | Antisense strand      |
|-----------|-------------|---------------------------------------------------------------------|-----------------------|-----------------------|
| NM_006109 | PRMT5       | protein arginine methyltransferase 5                                | GGAGGGACCUGAAUUGCGUCC | ACGCAAUUCAGGUCCCUCCCG |
| NM_001809 | CENPA       | centromere protein A                                                | GGGUUUUUUGUAGUUUCUUU  | AGAAACUACAAAAUACCCAU  |
| NM_016343 | CENPF       | centromere protein F, 350/400ka (mitosin)                           | GGAAGCAGUAAUUGUCAGAAA | UCUGACAAUACUGCUUCCUA  |
| NM_006558 | KHDRBS3     | KH domain containing, RNA binding, signal transduction associated 3 | GGUUUCCAUAGAAUUUAGUUA | ACUAAAUUCUUGGAAACCUU  |
| NM_006784 | WDR3        | WD repeat domain 3                                                  | CUUUGCACAUGAUGACAGUGU | ACUGUCAUCAUGUGCAAAGAG |
| NM_006824 | EBNA1BP2    | EBNA1 binding protein 2                                             | CGACAGAAGCUGCAGACUAAA | UAGUCUGCAGCUUCUGUCGAA |
| NM_006845 | KIF2C       | kinesin family member 2C                                            | CCCCGUUCCGUGAGAGCAAGC | UUGCUCUCACGGAACGGGGUG |
| NM_017588 | WDR5        | WD repeat domain 5                                                  | GAGGCCCUUCAGUCUUGUUC  | ACAAGACUGAAGGGGCCUCGC |
| NM_138419 | FAM54A      | family with sequence similarity 54, member A                        | GCCUACACUUGCUAUGUAAAU | UUACAUAGCAAGUGUAGGCAA |
| NM_000676 | ADORA2B     | adenosine A2b receptor                                              | GUCACAUGCCAAUUCAGUUGU | AACUGAAUUGGCAUGUGACAG |
| NM_004431 | EPHA2       | EPH receptor A2                                                     | GCUCUGGAAUAAAGUUGCAGA | UGCAACUUUUAUCCAGAGCAG |
| NM_012112 | TPX2        | TPX2, microtubule-associated, homolog (Xenopus laevis)              | GCUCAACCGUGCCACAUJAU  | AAUGUGGCACAGGUUGAGCUU |
| NM_014317 | PDSS1       | prenyl (decaprenyl) diphosphate synthase, subunit 1                 | GGUGCGUGGUGAAUUUCUUCA | AAGAAUUCACCACGCACCAA  |
| NM_014321 | ORC6L       | origin recognition complex, subunit 6 like                          | CAUGGCUUCAAGAUACUAAA  | UAGUAUCUUUGAAGCCAUGUU |
| NM_012323 | MAFF        | v-maf musculoaponeurotic fibrosarcoma oncogene homolog F            | GGGAGACCGCUCUCUGCAAGG | UUGCAGAGAGCGGUCUCCCAA |
| NM_000160 | GCGR        | glucagon receptor                                                   | CCGACACCCCCGCCAAUACC  | UAUUGCGGGGGUGUCCGGCC  |
| NM_018204 | CKAP2       | cytoskeleton associated protein 2                                   | CAAGUCCUUAUUGAAAAUUA  | AUAUUUUAUAGGACUUGUG   |
| NM_013277 | RACGAP1     | Rac GTPase activating protein 1                                     | CUGAUUCGAGAGAUGCUCUAG | UGAGCAUCUCUGAAUCAGCU  |

|           |        |                                                                     |                        |                        |
|-----------|--------|---------------------------------------------------------------------|------------------------|------------------------|
| NM_001033 | RRM1   | ribonucleotide reductase M1 polypeptide                             | CACCCAUUUAGCAUGCUUUUC  | AAAGCAUGCUAAAUGGGUGAU  |
| NM_002225 | IVD    | isovaleryl Coenzyme A dehydrogenase                                 | GCCCUGGACGGCAUUCAGUGU  | ACUGAAUGCCGUCCAGGGCUA  |
| NM_004523 | KIF11  | kinesin family member 11                                            | GAAGUGUUGUUUGUCCAAUUC  | AUUGGACAAACAACACUUCGG  |
| NM_000228 | LAMB3  | laminin, beta 3                                                     | CAACUUAACCUUAUGGAUUUA  | AAUCCAUAAGGUUAAGUUGGA  |
| NM_006739 | MCM5   | MCM5 minichromosome maintenance deficient 5, cell division cycle 46 | GAACUCAAGCGGCAUUCACAAC | UGUAAUGCCGCUUGAGUUCAU  |
| NM_002421 | MMP1   | matrix metalloproteinase 1                                          | GCGUGUGACAGUAAGCUAACC  | UUAGCUUACUGUCACACGCUU  |
| NM_002506 | NGFB   | nerve growth factor, beta polypeptide                               | CUGGACUAAACUUCAGCAUUC  | AUGCUGAAGUUUAGUCCAGUG  |
| NM_018454 | NUSAP1 | nucleolar and spindle associated protein 1                          | CAAUAACAAGAAUAGGGUAAG  | UACCCUUAUUCUUGUUUAUGUU |
| NM_016448 | DTL    | denticleless homolog (Drosophila)                                   | CAUCCAAGUCUUUCCUGUACC  | UACAGGAAAGACUUGGAUGCU  |
| NM_032957 | RTEL1  | regulator of telomere elongation helicase 1                         | CGCUCCUGUCAUUUCUACAAC  | UGUAGAAAUGACAGGAGCGAC  |
| NM_018131 | CEP55  | centrosomal protein 55kDa                                           | CCCUCUCAUUUGAUUGACAGU  | UGUCAAUCAAUAGAGAGGGCU  |
| NM_018410 | HJURP  | Holliday junction recognition protein                               | CAUAAGUUAGAUGCAAGUUGG  | AACUUGGAUCUAAUUAUGGA   |
| NM_000946 | PRIM1  | primase, polypeptide 1, 49kDa                                       | CUUUCAACACCGUGAAUUUUC  | AAAUUCACGGUGUUGAAAGUA  |
| NM_018492 | PBK    | PDZ binding kinase                                                  | CUGUGAUGUAGGAGUCUCUCU  | AGAGACUCCUACAUCACAGAU  |
| NM_020182 | TMEPAI | transmembrane, prostate androgen induced RNA                        | CUAUGAAUUGUACGUUUCAGA  | UGAAACGUACAAUUCUAGGG   |
| NM_002916 | RFC4   | replication factor C (activator 1) 4, 37kDa                         | GUUCAAAAUUCCGCUUCAAGC  | UUGAAGCGGAAUUUUGAACAU  |
| NM_000057 | BLM    | Bloom syndrome                                                      | CGUGCGAUUUGUGAUUCAUGC  | AUGAAUCACAAAUCGCACGUC  |
| NM_022346 | NCAPG  | non-SMC condensin I complex, subunit G                              | GAGGUAUCUGAACUUAGGACU  | UCCUAAGUUCAGAUACCUCAC  |
| NM_021630 | PDLIM2 | PDZ and LIM domain 2 (mystique)                                     | CAUACUAGCUCUAUAAUUAUA  | UAUUUUAUAGAGCUAGUAUGUC |
| NM_003035 | STIL   | SCL/TAL1 interrupting locus                                         | CUGGAAUUUCAUCAUAGUUC   | ACUAUGAUGAAUUUCCAGAU   |

|           |           |                                                                    |                       |                       |
|-----------|-----------|--------------------------------------------------------------------|-----------------------|-----------------------|
| NM_005630 | SLCO2A1   | solute carrier organic anion transporter family, member 2A1        | CACAACCCCCUCUACAUGAUG | UCAUGUAGAGGGGUUGUGGG  |
| NM_003311 | PHLDA2    | pleckstrin homology-like domain, family A, member 2                | GGAACCGGCUUUGAAUGAAUA | UUCAUUCAAAGCCGGUUCCEA |
| NM_032464 | LAT2      | linker for activation of T cells family, member 2                  | CCUAAUUGCUAUUGUUGGUUG | ACCAACAAUAGCAAUUAGGAA |
| NM_007088 | CALB2     | calbindin 2, 29kDa (calretinin)                                    | GCUACAUCGAAGCCAAUGAGC | UCAUUGGCUUCGAUGUAGCCA |
| NM_024633 | C14orf139 | chromosome 14 open reading frame 139                               | CAGCUUUGGAGGAACGAUUAC | AAUCGUUCCUCCAAAGCUGGU |
| NM_024745 | SHCBP1    | SHC SH2-domain binding protein 1                                   | GACUACCACAAUCUGUUGUCU | ACAACAGAUUGUGGUAGUCA  |
| NM_003494 | DYSF      | dysferlin, limb girdle muscular dystrophy 2B (autosomal recessive) | CUGGGGUAACGUGAAACCUGU | AGGUUUCACGUUACCCAGGG  |
| NM_003500 | ACOX2     | acyl-Coenzyme A oxidase 2, branched chain                          | GCAAUUGCACCCCGACAUAGA | UAUGUCGGGUGCAUUUGCCU  |
| NM_031480 | RIOK1     | RIO kinase 1 (yeast)                                               | GUUGUACCUGCAGGUCAUUCA | AAUGACCUGCAGGUACAACUC |
| NM_003798 | CTNNAL1   | catenin (cadherin-associated protein), alpha-like 1                | CUAAAGGUUGACAAGUGUAUU | UACACUUGUCAACCUUUAGAA |
| NM_001237 | CCNA2     | cyclin A2                                                          | CCCAGAAGUAGCAGAGUUUGU | AAACUCUGCUACUUCUGGGGG |
| NM_031966 | CCNB1     | cyclin B1                                                          | GUUUUUGCAAGCAAUAUGA   | AUAUUUGCUUGCAAUAAACAU |
| NM_003980 | MAP7      | microtubule-associated protein 7                                   | CAGGAACGAGAGAAGCAUUUC | AAUGCUUCUCUCGUUCCUGCC |
| NM_003981 | PRC1      | protein regulator of cytokinesis 1                                 | GCUUUGAAAGAGAUGUGGUGU | ACCACAUCUCUUUCAAGCUU  |
| NM_004701 | CCNB2     | cyclin B2                                                          | GUUCCCAAUCCGAGAAAUGG  | AUUUCUCGGAUUUGGGAACUG |
| NM_004217 | AURKB     | aurora kinase B                                                    | GUAUGUAUAGGGGAAAGAAGG | UUCUUUCCCCUAUACAUACAC |
| NM_016195 | MPHOSPH1  | M-phase phosphoprotein 1                                           | GUCUUCGAAUAAGACCAUUUA | AAUGGUCUUUUCGAAGACAA  |
| NM_014750 | DLG7      | discs, large homolog 7 (Drosophila)                                | GCACCUAAGGAUUUUUUGUUU | ACAUAAAUCCUJAGGUGCGA  |
| NM_014783 | ARHGAP11A | Rho GTPase activating protein 11A                                  | GUUUCUGAUCACAUACAGUGG | ACUGUAUGUGAUCAGAAACCU |
| NM_014865 | NCAPD2    | non-SMC condensin I complex, subunit D2                            | CCGGGAAGCCGUGCUUUAUGC | AUUAAGCACGGCUUCCCGGAC |

|           |           |                                                                        |                       |                        |
|-----------|-----------|------------------------------------------------------------------------|-----------------------|------------------------|
| NM_004702 | CCNE2     | cyclin E2                                                              | GUCUAUACCAUAGCAAUGUUU | ACAUUGCUAUGGUUAGACUG   |
| AB007899  | NEDD4L    | neural precursor cell expressed, developmentally down-regulated 4-like | CCUUCUUCAUUGAUCAUAACA | UUAUGAUCAAUGAAGAAGGGC  |
| BM928826  | COL8A1    | collagen, type VIII, alpha 1                                           | GGCCAAAUUACUUUGGGUUG  | ACCCAAAGUAUUAUUUGGCCAC |
| NM_199420 | POLQ      | polymerase (DNA directed), theta                                       | GUAGUAGCCAGAACUGAGAGA | UCUCAGUUCUGGCUACUACUU  |
| AK001630  | ETS1      | v-ets erythroblastosis virus E26 oncogene homolog 1 (avian)            | CAUCCCUUACUUACUUGUUA  | ACAAGUAAGUAAAGGGAUGUG  |
| AB037820  | MARCH4    | membrane-associated ring finger (C3HC4) 4                              | CUGAACUAUGACAAGACAAAA | UUGUCUUGUCAUAGUUCAGCA  |
| BU599262  | GOLT1A    | golgi transport 1 homolog A (S. cerevisiae)                            | GCUGUUCGAGACUUAAGG    | UUGAAGUCUCCGGAACAGCGC  |
| AI669535  | LOC729680 | Hypothetical protein LOC729680                                         | GAGUAGGAACUCUCCAACAUC | UGUUGGAGAGUUCUACUCCG   |
| AF070641  | ETV1      | ets variant gene 1                                                     | CCAUAAAAUGGGUAAUUCUCU | AGAAUUACCCAUUUUAUGGUU  |
| AL833733  | LARP2     | La ribonucleoprotein domain family, member 2                           | CUAAAUAACCCAGUUCAGA   | UGAACUGGGUUUUAUUJAGCU  |
| NM_138927 | SON       | SON DNA binding protein                                                | GCAUCUAGACGUUCUAUGAUG | UCAUAGAACGUCUAGAUGCUA  |
| BC021124  | C15orf23  | chromosome 15 open reading frame 23                                    | GAAGCUACUUAGGACAUCAUC | UGAUGUCCUAAGUAGCUUCCU  |
| AK000079  | LOC144703 | hypothetical gene supported by AK000079                                | GCAUUGUCCAUGGUUAUUAA  | AAUAACCAUGGAACAAUGCCC  |
| AK000596  | HPCAL1    | hippocalcin-like 1                                                     | GAACCGUGUGGGACUCACAGG | UGUGAGUCCCACACGGUUCUC  |
| AB011117  | SIPA1L3   | signal-induced proliferation-associated 1 like 3                       | CGCAAUCCGACGUCUUCAGA  | UGAAGACGUCGGAUUUGCGGA  |
| NM_019014 | POLR1B    | polymerase (RNA) I polypeptide B, 128kDa                               | GAUCAUACAGUGAGUGCUACC | UAGCACUCACUGUAUGAUCGG  |
| X74794    | MCM4      | MCM4 minichromosome maintenance deficient 4 (S. cerevisiae)            | GUUAUCCAACUUUUGACAUG  | UGUCAAAAGUUGGAAUACUU   |
| AF275804  | LOC388279 | hypothetical gene supported by AF275804                                | GGGUUUUCCUGUUUAUAGACU | UCUAUAAACAGGAAUACCCAA  |
| AK021789  | C16orf52  | chromosome 16 open reading frame 52                                    | GCUUUUACCGAAAAGCAUGU  | AUGCUUUUCGGUAUAAAGCAU  |

---
